# Supplementary material
Source: PubMed Central journal article supplement (PMC8175042)
Supplement: mmc1.pdf [file mmc1.pdf]

# THE LANCET

## Global Health

### Supplementary appendix

This appendix formed part of the original submission. We post it as supplied by the authors.

Supplement to: Sanyang B, Kanteh A, Usuf E, et al. COVID-19 reinfections in The Gambia by phylogenetically distinct SARS-CoV-2 variants—first two confirmed events in west Africa. *Lancet Glob Health* 2021; published online June 3. [http://dx.doi.org/10.1016/S2214-109X\(21\)00213-8](http://dx.doi.org/10.1016/S2214-109X(21)00213-8).

COVID-19 re-infections in The Gambia by  
phylogenetically distinct SARS-CoV-2 variants, first  
two confirmed events in West Africa Appendix

COVID-19 re-infections in The Gambia by phylogenetically distinct SARS-CoV-2 variants, first two confirmed events in West Africa Appendix .....1

Mutation analysis of SARS-Cov-2 strains isolated from the infection episodes of patients.....2

Figure 1 .....3

**Mutation analysis of SARS-Cov-2 strains isolated from the infection episodes of patients**

Appendix 0.0: Figure 1. Mutations in the S-gene of variants from the two infection episodes for each patient (a = patient A and b = patient B) compared to the Wuhan reference (NC\_045512.2).

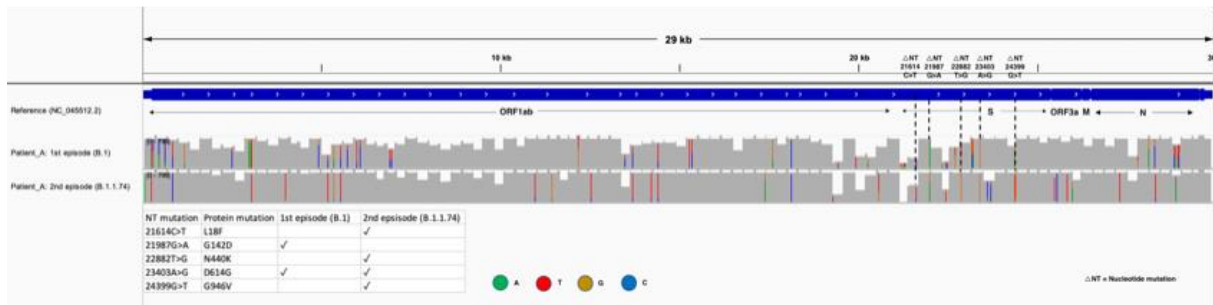

(a)

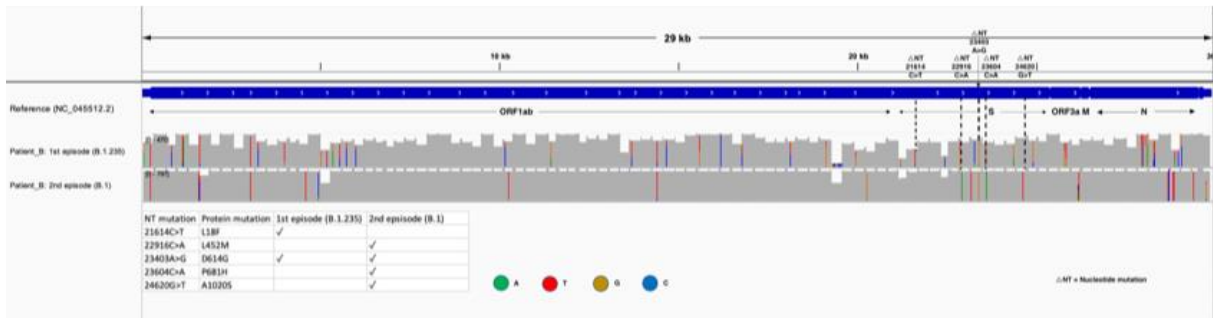

(b)

In each figure, on the first track is the reference. The middle track shows variant from the first episode and bottom track shows variant from reinfection. The grey colour along the tracks indicates similarity between the query sequence and the reference, whereas the coloured points indicate nucleotide differences between the query and the reference. Different nucleotides are shown with different colours. The box in the bottom left corner shows, for each infection episode, nucleotide mutations on the S gene and their corresponding amino acid changes.
